# Supplementary material
Source: PubMed Central journal article supplement (PMC2757245)

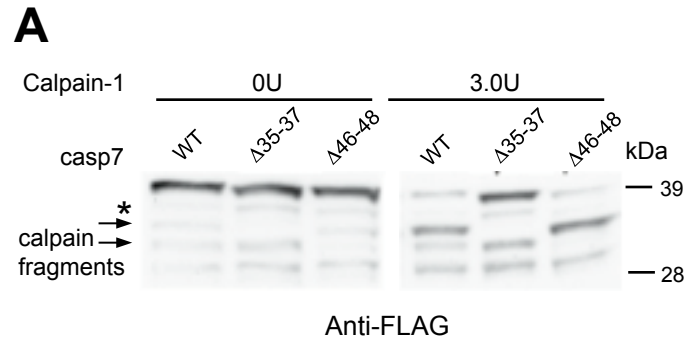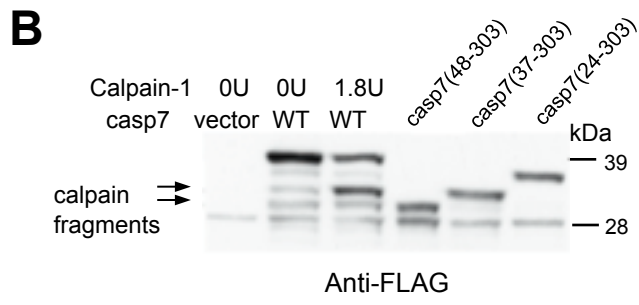

**Supplemental Figure 1**

Supplement: supp_M109.038174_jbc.M109.038174-1.pdf [file supp_M109.038174_jbc.M109.038174-1.pdf]
